1 **Culturing of ‘Unculturable’ Subsurface Microbes: Natural Organic Carbon Source**  
2 **Fuels the Growth of Diverse and Distinct Bacteria from Groundwater**

3

4

5 Xiaoqin Wu<sup>1</sup>, Sarah Spencer<sup>2</sup>, Sara Gushgari-Doyle<sup>1</sup>, Mon Oo Yee<sup>1</sup>, Jana Voriskova<sup>1</sup>,  
6 Yifan Li<sup>1</sup>, Eric J. Alm<sup>2</sup>, Romy Chakraborty<sup>1\*</sup>

7

8

9 <sup>1</sup>Department of Ecology, Earth and Environmental Sciences Area, Lawrence Berkeley  
10 National Laboratory, Berkeley, California 94720, USA

11 <sup>2</sup>Department of Biological Engineering, Massachusetts Institute of Technology,  
12 Cambridge, Massachusetts 02139, USA

13

14

15

16 \*Corresponding author:

17 Romy Chakraborty

18 Address: 70A-3317F, 1 Cyclotron Rd., Berkeley, CA 94720

19 Tel: (510) 486-4091

20 Email: [rchakraborty@lbl.gov](mailto:rchakraborty@lbl.gov)

21

## 22 **ABSTRACT**

23 The recovery and cultivation of diverse field-related microorganisms from the terrestrial  
24 subsurface environment remains a challenge despite recent advances in modern  
25 molecular technology. Here we applied natural organic carbon (C), i.e., sediment-derived  
26 natural organic matter (NOM) and bacterial cell lysate, to groundwater microbial  
27 communities for a 30-day enrichment incubation, followed by conventional direct-plating  
28 for isolation. The groundwater was collected from a background well at the Oak Ridge  
29 Reservation Field Research Center, Tennessee. As a comparison, we also included  
30 enrichments amended with simple organic C sources, including glucose, acetate,  
31 benzoate, oleic acid, cellulose, and mixed vitamins. Our results demonstrate that complex  
32 natural organic C sources are more effective in enriching diverse bacterial species from  
33 groundwater than simple organic C sources. Microcosms amended with simple organic C  
34 (glucose, acetate, benzoate, or oleic acid) show significantly lower biodiversity than  
35 unamended control and are dominated by only few phyla such as *Proteobacteria* and  
36 *Bacteroidetes*. In contrast, microcosms amended with complex natural organic C  
37 (sediment NOM or bacterial cell lysate) display significantly higher biodiversity, and  
38 enrich distinct species from the phyla that are poorly represented in published culture  
39 collections (e.g., *Verrucomicrobia*, *Planctomycetes*, and *Armatimonadetes*). Our  
40 subsequent isolation efforts from natural organic C-amended enrichments led to 222  
41 purified bacterial isolates representing 5 phyla, 16 orders, and 54 distinct species  
42 including candidate novel, rarely cultivated, and undescribed organisms.

43

## 44 **Importance**

45 Innovative strategies for recovering bacterial strains representing the true diversity of  
46 microbial communities in the terrestrial subsurface would significantly advance the  
47 understanding of ecologically critical taxa residing in these ecosystems. In this study, we  
48 demonstrate that complex natural organic C that mimic the naturally available resources  
49 for microbes encourages the growth of diverse bacteria much more robustly than  
50 traditional simplistic organic C sources. Results from this study will substantially  
51 advance and improve the design of strategies to effectively cultivate and isolate diverse  
52 and novel subsurface microorganisms in the laboratory. Obtaining axenic cultures of the  
53 ‘once-unculturable’ microorganisms will greatly enhance our understanding of microbial  
54 physiology, function, and roles in different biogeochemical niches in terrestrial  
55 subsurface ecosystems.

56

## 57 **Introduction**

58           Compared to animal and plant hosts, other non-human environments on Earth  
59 such as marine sediment, seawater, soil, and the terrestrial subsurface host prodigious and  
60 undiscovered microbial populations, as most of them have never been cultured and  
61 characterized in the laboratory<sup>1</sup>. In the terrestrial subsurface, it is estimated that there are  
62  $2,500 \times 10^{26}$  microbial cells, of which more than 70% belong to uncultured clades and  
63 thus their physiologies and ecological impacts remain largely mysterious<sup>1</sup>. Despite rapid  
64 technological advances in modern molecular tools—such as metagenomics,  
65 metatranscriptomics, and metaproteomics—for identification of key microbial taxa and  
66 critical metabolic processes in a given environment, a complete interpretation of omics-  
67 based data is still constrained by the unavailability of reference genomes and isolates<sup>2</sup>.  
68 Challenges in microbial cultivation/isolation in the laboratory have impeded the ability of  
69 microbiologists to fully investigate the roles and function of microbes in terrestrial  
70 subsurface ecosystems.

71           Successful recovery and cultivation of environmental microbes in the laboratory  
72 critically depends on appropriate growth media and incubation conditions that best mimic  
73 the ecological habitat of the bacteria<sup>3</sup>. Enrichment culturing is a common initial step in  
74 microbial isolation to select for microorganisms with specific metabolisms within the  
75 total microbial population. The choice of organic carbon (C) substrate is of paramount  
76 importance in enrichment media composition. Yeast extract and simple organic  
77 compounds such as glucose, acetate, lactate, pyruvate, and casamino acids are amended  
78 routinely, either as an individual C source or as a mixture with the understanding that  
79 most microbes utilize these C substrates<sup>4</sup>. However, these labile C compounds commonly

80 lead to selective and biased growth of microorganisms with kinetic advantages (e.g. fast  
81 growing microorganisms), generally considered as ‘weeds’<sup>5,6</sup>, and have rarely recovered  
82 slow growing metabolically active microbes from the environment<sup>7</sup>. For this reason,  
83 despite the rapid advances in “omics” technologies, we have still only been able to  
84 cultivate less than 2% of microbes on Earth in the laboratory<sup>8-10</sup>.

85 Rationally designed growth medium that closely mimics the natural  
86 environmental habitats of microorganisms has proven to be an effective strategy in  
87 recovering diverse and previously uncultivable organisms from various environments<sup>11-</sup>  
88 <sup>16</sup>. Specifically, microorganisms in subsurface are reported to grow optimally in low  
89 nutrient availability or oligotrophic conditions<sup>17</sup>. In groundwater, natural organic matter  
90 (NOM) derived from the adjacent sediment provides the available C source for  
91 microorganisms. Our previous study shows that sediment-derived NOM contains a  
92 myriad of heterogenous organic compounds—mostly recalcitrant C such as lignin-like  
93 compounds and a small portion of relatively labile C such as carbohydrate- and protein-  
94 like compounds<sup>18</sup>. Other natural C source available for microorganisms in groundwater  
95 can be from dead, lysed microbial biomass turnover. Despite the potential of these natural  
96 C sources for diverse microbial cultivation under laboratory conditions, no research has  
97 been reported on the application of sediment NOM or microbial cell lysate for  
98 cultivation/isolation of microorganisms from the terrestrial subsurface environment.

99 In this study, we aim to develop an effective cultivation strategy using naturally  
100 occurring complex C to recover diverse, rarely cultivated, and novel bacteria from  
101 groundwater collected at the Field Research Center (FRC) in Oak Ridge, Tennessee. Our  
102 results show that natural complex C such as NOM and bacterial cell lysate are much

103 more effective than conventional simple organic C sources in encouraging the growth of  
104 diverse and distinct bacteria from groundwater, providing a platform for the recovery of  
105 undiscovered bacteria that constitute ‘microbial dark matter’ in the subsurface. Results  
106 from this study will aid in the design of successful cultivation strategies to unlock diverse  
107 novel, previously uncultured, or ecologically important subsurface microbes for  
108 phenotypic and genomic analysis, which will greatly advance our understanding of  
109 microbial physiology, roles, and function in biogeochemical cycles in the terrestrial  
110 subsurface.

111

## 112 **Results**

113 In this study, we applied a two-step workflow for cultivating and isolating a broad  
114 diversity of bacteria from groundwater. Microcosm enrichments amended with different  
115 C sources were used as the first step to enrich bacterial species from Oak Ridge FRC  
116 groundwater. We evaluated two types of complex natural organic C source: FRC  
117 sediment-extracted NOM and bacterial cell lysate. The bacterial cell lysate was prepared  
118 using a native, naturally abundant bacterial strain isolated from FRC groundwater to  
119 mimic the cell lysis products available for groundwater microorganisms. For comparison,  
120 we also evaluated several types of simple organic C source, i.e., conventional C source  
121 (glucose and acetate), naturally occurring compounds (benzoate, oleic acid, and  
122 cellulose), and mixed vitamins. The mixed vitamins were included because they are often  
123 added as supplements to bacterial growth media<sup>19, 20</sup>, and we wanted to test whether they  
124 are a limiting factor for support of microbial growth in this experiment. After enrichment  
125 cultivation, conventional direct plating was conducted to obtain axenic bacterial isolates

126 from enrichment cultures amended with complex natural organic C source (i.e. NOM or  
127 cell lysate).

128

129 *Natural organic C source increases bacterial diversity in enrichments*

130 Our results show that both C type and length of incubation have significant  
131 influence on bacterial community structure in enrichment cultures. Statistical analysis  
132 reveals that C type is the major driver of community dissimilarity (MANOVA/*adonis*,  $R^2$   
133 = 0.56; ANOSIM,  $R = 0.88$ ,  $p = 0.001$ ), with incubation time contributing to a lesser  
134 extent to variation (MANOVA/*adonis*,  $R^2 = 0.09$ ; ANOSIM,  $R = 0.12$ ,  $p = 0.001$ ). We  
135 accordingly grouped samples by NMDS ordination based on the type of amended C  
136 source (Figure 1). The bacterial community in enrichments amended with glucose,  
137 acetate, benzoate, oleic acid, bacterial cell lysate, or sediment NOM clearly differs from  
138 the unamended control. The bacterial community composition in cultures amended with  
139 small organic C (glucose, acetate, benzoate, or oleic acid) are noticeably similar to each  
140 other at an early stage of incubation, and then diversify at later stages—while bacterial  
141 community composition in cultures amended with complex natural organic C (bacterial  
142 cell lysate or sediment NOM) separate far from other groups from early on.

143 We also observe that the diversity of the enriched bacterial community is related  
144 to the complexity of amended C substrates (Figure 2). The bacterial diversities in  
145 enrichments amended with small organic C (glucose, acetate, benzoate, or oleic acid) are  
146 generally lower than those in unamended control (Figure 2A). This strongly suggests that  
147 providing microbial communities with a simple, small organic C source in growth media  
148 will decrease diversity and lead to enrichment of a select few bacterial species that

149 preferentially utilize these C substrates. In contrast, the bacterial diversities in  
150 enrichments amended with complex natural organic C (bacterial cell lysate or sediment  
151 NOM) are higher than those in unamended control, demonstrating the power of natural  
152 organic C in promoting growth of diverse bacteria (Figure 2A).

153 Cellulose and mixed vitamins show relatively little influence on bacterial  
154 community composition and diversity in comparison with the unamended control (Figure  
155 1 and 2A), and therefore are not included in our further statistical analysis.

156

157 *Natural organic C source enriches distinct bacterial taxa*

158 We investigate the short-term response of bacterial community structure to  
159 different C sources in enrichment cultures via 16S rRNA gene survey. Out of the quality-  
160 filtered reads, organisms from 21 phyla and 94 orders are taxonomically identified,  
161 covering 71–100% of all reads, except for two samples (57% and 60%) in the bacterial  
162 cell lysate-amended group. All phyla and abundant orders (with relative abundance >1%  
163 in any sample) are presented in Figure 2B and Supplementary Figure S1, respectively.

164 *Proteobacteria* and *Bacteroidetes* are the two most dominant phyla in all groups,  
165 especially in those amended with small organic C. It is worth noting that the phyla  
166 *Verrucomicrobia*, *Planctomycetes*, and *Armatimonadetes*, which are rarely cultivated  
167 from environmental samples, are enriched abundantly in sediment NOM-amended  
168 cultures with clear succession patterns (Figure 2B). The relative abundance of  
169 *Verrucomicrobia* significantly diminishes over time from 18–27% at Day 10 to less than  
170 2% at Day 30. Meanwhile *Planctomycetes* becomes one of the major phyla at later stages,  
171 with relative abundance increasing from 0.1–1% at Day 10 to 5–33% at Day 30.



172 *Armatimonadetes* also increases during the incubation period, with relative abundance up  
173 to 10% at Day 30.

174 In microcosms amended with small organic C, only a few taxonomic orders such  
175 as *Caulobacteriales*, *Burkholderiales*, *Rhodocyclales*, and *Cytophagales* are enriched,  
176 while in complex natural organic C-amended microcosms, diverse taxonomic orders are  
177 enriched, including those scarcely enriched in other groups, e.g., *Sphingobacteriales*,  
178 *Gemmatales*, *Planctomycetales*, *Verrucomicrobiales*, and *Solibacteriales* (Supplementary  
179 Figure S1).

180 Based on one-way ANOVA with Dunnett's test results, we identify a total of 166  
181 OTUs that are promoted to grow by test C sources, with significantly ( $p < 0.01$ ) increased  
182 relative abundances in C-amended enrichment cultures compared to the corresponding  
183 unamended control at each time point. These promoted OTUs widely distribute across 11  
184 phyla (Figure 3A). Compared to simple organic C sources (glucose, acetate, benzoate,  
185 and oleic acid), the complex natural organic C sources (sediment NOM and bacterial cell  
186 lysate) show a great advantage in promoting the growth of diverse and distinct bacterial  
187 species. Most of promoted OTUs (110 out of 166) are exclusively promoted by complex  
188 natural organic C sources (Figure 3B), especially those from rarely cultured phyla  
189 *Verrucomicrobia*, *Planctomycetes*, and *Armatimonadetes*. A small portion (41 out of 166)  
190 are exclusively promoted by simple organic C sources, most of which are from the phyla  
191 *Proteobacteria* and *Bacteroidetes*, and a few from *Acidobacteria* and WPS-2 (Figure  
192 3B). There are 15 OTUs that can be promoted by both simple and complex organic C  
193 sources, suggesting that they likely harbor the metabolic potential for utilizing diverse C  
194 sources, from simple organic C to complex natural organic C.

195 Besides amended C source, incubation time also affects the enriched bacterial  
196 species. In those 110 OTUs exclusively promoted by complex C sources, we observe  
197 slow growers (25 out of 110) that exhibit significant enrichment at late incubation stage  
198 (on Day 30), and also consistent growers (29 out of 110) which are enriched in the  
199 cultures consistently from Day 10 to Day 30 (Figure 3A).

200

### 201 *Novel bacterial isolates from natural organic C-amended enrichments*

202 Since complex natural organic C shows greater potential in enriching diverse and  
203 distinct bacterial species, we then use the complex C (bacterial cell lysate and sediment  
204 NOM)-amended enrichments as inocula in our further isolation work. In this study, we  
205 obtained a total of 222 bacterial isolates (Supplementary Table S2) representing 5 phyla,  
206 16 orders, and 54 distinct species (Figure 4 and Supplementary Table S3). A comparison  
207 between the enrichment and isolation results shows that our bacterial isolates represent  
208 one-third (10 out of 33) of the enriched orders (Supplementary Figure S1), and 16% (27  
209 out of 166) of the promoted OTUs (Figure 3A and Supplementary Table S1). We  
210 obtained representative isolates not only for the OTUs that are exclusively promoted by  
211 complex C source (e.g., denovo1156), but also for the OTUs that are exclusively  
212 promoted by simple C sources and exist at very low relative abundance ( $< 0.1\%$ ) in the  
213 complex C-amended enrichment cultures (e.g., denovo2244). We also obtained bacterial  
214 isolates representing slow growers (e.g., denovo3150) and consistent growers (e.g.,  
215 denovo243, denovo422, denovo1156, and denovo2687) from our isolation efforts (Figure  
216 3A).

217 Thresholds for determining the novelty of an isolate based on 16S rRNA gene

218 sequence similarity have differed slightly in different reports<sup>21, 22</sup>. Here we apply the  
219 thresholds of 98% for novel species, 95% for novel genera, and 90% for novel families<sup>15</sup>.  
220 According to these criteria, of the 54 distinct bacterial species isolated from FRC  
221 groundwater, nine belong to candidate novel species and three belong to candidate novel  
222 genera (Figure 4 and Supplementary Table S3). These novel isolates distribute across two  
223 phyla *Proteobacteria* and *Bacteroidetes*, which are the most dominant phyla in the  
224 original FRC groundwater sample (data not shown) as well as enrichment cultures in this  
225 study. Besides, there are 9 undescribed species unassigned at the genus level in the  
226 SILVA database, indicating that they are from the less characterized genera with  
227 unresolved taxonomy. The reconstructed phylogenetic trees for these novel and  
228 undescribed organisms are presented in Figure 5 and Supplementary Figure S2.

229

## 230 **Discussion**

231       There is a compelling need for improving the recovery of diverse bacteria from  
232 environments. Several ongoing efforts include modification of growth  
233 media/conditions<sup>23</sup>, use of diluted medium or serial dilution culture<sup>24, 25</sup>, and cultivation  
234 with physical separation (e.g., iChip<sup>26</sup> or diffusion chambers<sup>12, 27, 28</sup>). However, the  
235 collective capability for recovering microorganisms from the terrestrial subsurface,  
236 especially those mediating critical biogeochemical cycles, is still limited. This bottleneck  
237 continues to hinder a thorough investigation of microbial ecology and understanding of  
238 physiology and true metabolic potential of key organisms residing in subsurface  
239 ecosystems.

240       In this study, we demonstrate that natural organic C sources (sediment NOM and

241 bacterial cell lysate) fuel the growth of much more diverse and distinct groups of  
242 microbes compared to traditional simple organic C sources. Natural organic C is a  
243 mixture of heterogeneous naturally occurring substrates<sup>18</sup>, making it a suitably  
244 appropriate C source in encouraging growth of diverse microbe representatives of in-situ  
245 environmental communities and typically those not cultivated in the laboratory. As  
246 shown in our enrichment results, almost all species from the rarely cultured phyla  
247 *Verrucomicrobia*, *Planctomycetes*, and *Armatimonadetes* show exclusive preference for  
248 complex C source especially sediment NOM (Figure 3A, 3B). To date, only a handful of  
249 *Verrucomicrobia* isolates have been successfully cultivated<sup>24, 29-33</sup>, although members of  
250 this bacterial phylum are highly prevalent in the environment<sup>34, 35</sup>. It is reported that only  
251 ~2% of strains in *Planctomycetes* have been isolated in pure cultures<sup>36</sup>. *Planctomycetes*  
252 are of deep interest to microbiologists because of their unique characteristics. They are  
253 reported to be comparatively slow growing organisms with low demand for C and  
254 nitrogen sources<sup>36</sup>, which may explain their significant enrichments at late incubation  
255 stage (Day 20 and 30) in this experiment (Figure 2B). The phylum *Armatimonadetes*  
256 lacked an isolated representative until 2011<sup>37</sup>, and so far, only a few cultivated strains in  
257 this phylum have been reported<sup>37-40</sup>. In this study, we observe that most of promoted  
258 *Planctomycetes* and *Armatimonadetes* species are exclusively enriched in sediment  
259 NOM-amended cultures only at late incubation stage (Figure 3A), indicating that these  
260 slow growers may possess high metabolic potential of utilizing relative recalcitrant C in  
261 sediment NOM, therefore avoid competition for labile C in sediment NOM with  
262 competitive fast growers<sup>18</sup>. Although we have not yet isolated pure bacterial strains from  
263 *Verrucomicrobia*, *Planctomycetes*, and *Armatimonadetes*, the results of this study will

264 augment our ongoing efforts to obtain pure isolates in the very near future.

265         Applying the two-step cultivation strategy, i.e., enrichment followed by isolation,  
266 we obtained pure cultures of 54 distinct bacterial species from groundwater, some of  
267 which are novel, previously uncultured, and uncharacterized organisms. Notably, we  
268 obtained two similar isolates (FW305-C-21 and FW305-C-23) from the candidate family  
269 env.OPS 17, which is a poorly described family in literature and lacks representative  
270 isolates. To date, there are only five described cultured organisms within this family,  
271 found to be associated with ascomycetous ectomycorrhizal fungi<sup>41</sup> or in freshwater  
272 springs (NCBI database). Our isolates FW305-C-21 and FW305-C-23 are distinct from  
273 those five cultured organisms (Figure 5, only showing FW305-C-21). While several of  
274 their close neighbors have been detected via molecular tools in various environments  
275 including pit<sup>42</sup>, drinking water<sup>43</sup>, uranium mining wastes<sup>44</sup>, freshwater lake, pond, soil,  
276 and sludge (information from the NCBI database), our isolates are the very first cultured  
277 organisms in this distinct clade. Our enrichment results show that species from this  
278 candidate family env.OPS 17, i.e., denovo1405 (with representative isolate FW305-C-21  
279 and FW305-C-23) and denovo2797, exclusively prefer complex natural C sources  
280 (Figure 3A and Table S1), which may explain why these organisms have rarely been  
281 cultivated in the laboratory.

282         We also obtained pure cultures of three distinct species: FW305-C-2, FW305-C-3,  
283 and FW305-C-57, from an undercharacterized order *Salinisphaerales* which has only 17  
284 reported genomes so far, the second-fewest in the class *Gammaproteobacteria* (NCBI  
285 lifemap). The isolates FW305-C-2 and FW305-C-3 are novel candidate genus members  
286 (Figure 4 and Table S3). Phylogenetic analysis of the isolate FW305-C-3 shows that it is

287 close to the genus *Fontimonas* (Figure S2). The isolate FW305-C-2 clusters together in  
288 the phylogenetic tree with multiple uncultured organisms (Figure S2). The only cultured  
289 organism in this clade, *Sinobacteraceae* bacterium MG649968.1, was reported very  
290 recently from surface freshwater<sup>45</sup>. We have therefore made a good contribution to the  
291 number of representative cultured organisms in this distinct clade.

292 This study demonstrates the potential of complex natural organic C, especially  
293 NOM, for enriching diverse and ecologically relevant bacterial taxa, and for retrieving  
294 pure cultures of novel, previously uncultured organisms from the terrestrial subsurface.  
295 Our cultivation strategy will benefit future development of effective and ecologically  
296 relevant cultivation/isolation strategies. These improved capabilities will be crucial for  
297 further understanding of bacterial physiology, functions, and roles in biogeochemical  
298 cycles in terrestrial subsurface ecosystems.

299

## 300 **Materials and Methods**

### 301 *Preparation of C stock solutions*

302 Glucose, sodium acetate, sodium benzoate, cellulose, oleic acid, vitamins, and  
303 thioctic acid were purchased from Sigma-Aldrich (St. Louis, MO). Stock solutions of  
304 glucose, sodium acetate, and sodium benzoate were prepared by dissolving the chemical  
305 in MilliQ-water (18.2 M $\Omega$ ·cm, 0.22  $\mu$ m membrane filtered) at 200 mM, 200 mM, and 50  
306 mM, respectively, followed by filter-sterilization with a filtration system (0.22  $\mu$ m pore-  
307 sized, polyethersulfone (PES), Corning). Oleic acid and cellulose were added to MilliQ-  
308 water at an initial concentration of 50 g/L and 20 g/L, respectively, followed by  
309 sterilization using an autoclave. Since oleic acid and cellulose are generally insoluble,

310 their concentrations in water are expressed as initial grams per liter. A stock solution of  
311 mixed vitamins, including vitamin B<sub>1</sub>, B<sub>2</sub>, B<sub>3</sub>, B<sub>5</sub>, B<sub>6</sub>, B<sub>7</sub>, B<sub>9</sub>, B<sub>10</sub>, B<sub>12</sub>, and thioctic acid,  
312 was prepared in MilliQ-water according to the recipe reported by Balch et al.<sup>19</sup>  
313 (Supplementary Table S4), and then filter-sterilized (0.22 µm pore-sized, PES, Corning).

314 Preparation of cell lysate solution was modified based on published methods<sup>46, 47</sup>.  
315 A strain of *Pseudomonas* spp previously isolated from Oak Ridge FRC groundwater was  
316 used for this purpose. The isolate, which by 16S rRNA gene sequence analysis was 99%  
317 identical to *Pseudomonas fluorescens*, was grown in a Luria broth (LB) liquid medium at  
318 30°C aerobically until early stationary phase. A 30 ml aliquot of the culture was  
319 harvested, followed by centrifugation at 6,000 g for 20 min. The supernatant was  
320 removed, and the pellet was washed by MilliQ-water three times before being re-  
321 suspended in 10 ml of MilliQ-water. A two-step lysis procedure was used, including  
322 autoclaving and sonication in a water bath for two hours, followed by centrifugation at  
323 6,000 g for 20 min. The supernatant was decanted and filtered through a syringe filter  
324 (0.2 µm pore-sized, PES, Thermo Scientific). The filtrate was stored at 4°C until use.  
325 Total organic C (TOC) content of the filtrate, i.e., cell lysate stock solution, was 2.67 g/L,  
326 measured by TOC-5050A Total Organic Carbon Analyzer (Shimadzu, Japan).

327 The sediment used for NOM extraction was collected from a background well  
328 FW305 at ORR-FRC, at a depth of 1.1 m below ground surface. The water-soluble  
329 fraction of sediment NOM was extracted according to a method previously developed in  
330 our lab<sup>18</sup>. Briefly, the freeze-dried sediment sample was extracted with Milli-Q water via  
331 rotary shaking (170 rpm) overnight at 35°C, and then sonicated in a water bath for 2  
332 hours. The ratio of water and sediment was 4:1 (w/w). After extraction, the water-

333 sediment slurry was centrifuged at 6000 g for 20 min. The supernatant was decanted and  
334 sterilized using a filtration system (0.22 µm pore-sized, PES, Corning). Filtrate  
335 containing water-extractable NOM was freeze-dried, and the lyophilized material was  
336 stored at -20°C until use.

337

### 338 *Microcosm enrichment*

339 The groundwater sample was collected from a background well, which adjoined  
340 the sediment well FW305 at ORR-FRC. The sample was shipped immediately to the lab  
341 after collection with ice packs and stored at 4°C for up to 1 week. At the time of  
342 sampling, groundwater temperature was measured to be 15.4°C, pH was 6.37, dissolved  
343 oxygen (DO) was 1.39 mg/L, TOC was 5.9 mg/L, NO<sub>3</sub><sup>-</sup> was 0.34 mg/L, PO<sub>4</sub><sup>3-</sup> was less  
344 than 3.0 mg/L. The DO in groundwater exceeded 0.5 mg/L, indicating that the  
345 groundwater sample's redox state was oxic (Ohio EPA,  
346 [http://epa.ohio.gov/Portals/28/documents/gwqcp/redox\\_ts.pdf](http://epa.ohio.gov/Portals/28/documents/gwqcp/redox_ts.pdf)).

347 Microcosm incubation experiments were performed in pre-sterilized 250 ml-  
348 flasks, each containing 89 ml of filtered groundwater (0.22 µm pore-sized, PES, Corning)  
349 as culture medium, 10 ml of unfiltered groundwater (cell density:  $2.1 \times 10^6$  cells/ml) as  
350 inoculum, and 1 ml of individual C stock solution. For oleic acid and cellulose, the stocks  
351 were shaken thoroughly to mix and homogenize the solution before adding to the  
352 enrichments. For the sediment NOM-amended group, the lyophilized NOM material was  
353 fully dissolved in filtered groundwater at 200 mg/L, and filter-sterilized (0.22 µm pore-  
354 sized, PES, Corning). TOC content of the filtrate was measured to be 48.4 mg/L. A 90 ml  
355 aliquot of the filtrate (containing sediment NOM) was added with 10 ml of unfiltered



356 groundwater. The organic C content added to the microcosms were designed to be at least  
357 five times higher than that in background groundwater (TOC 5.9 mg/L). The final  
358 concentration of substrates in the microcosms are listed in Supplementary Table S5.

359 An unamended control without any additional C source was included in this  
360 study, for which each flask only contained 90 ml of filtered groundwater and 10 ml of  
361 unfiltered groundwater. All groups were performed in six replicates. One blank control  
362 (without inoculum) was included in each group to monitor potential microbial  
363 contamination during incubation. All microcosms were incubated aerobically at 25°C in  
364 the dark for up to 30 days, with rotary shaking at 100 rpm. At each sampling time point  
365 (days 10, 20, and 30), a 10 ml aliquot of subculture was sampled using a sterile  
366 volumetric pipette. Microbes were concentrated by filtration through a membrane filter  
367 (0.2 µm pore-sized, PES, 25 mm, Sterlitech Corp.). The filter was then removed from the  
368 syringe filter holder and kept frozen at -80°C until DNA extraction.

369

#### 370 *DNA extraction for microbial community analysis*

371 Before DNA extraction was conducted, the filters were cut into 2 mm-wide  
372 stripes using sterile blades and put into DNA extraction tubes provided in PowerMax Soil  
373 DNA Isolation Kit (MO BIO Laboratories, Inc., Carlsbad, CA). DNA was extracted  
374 following the manufacturer's protocol, and quantified using the Qubit dsDNA HS Assay  
375 Kit (Life Technologies, Eugene, OR) with a Qubit fluorometer (Invitrogen, Eugene, OR).  
376 Extracted DNA were stored at -20°C until further processing.

377

#### 378 *16S rRNA gene amplicon library preparation*

379 For analysis of bacterial community composition, a two-step PCR protocol was  
380 performed. In the first step the 16S rRNA gene of V4 variable region was amplified and  
381 in the second step Illumina barcodes and adapters for sequencing were added. Extracted  
382 DNA from enrichments were each aliquoted into one of three randomized plate layouts in  
383 a laminar flow hood.

384 Before the first step PCR, all samples were subjected to a qPCR at multiple  
385 dilutions to determine target dilutions and threshold cycles for the first step. We used 16S  
386 rRNA gene primers PE16S\_V4\_U515\_F and PE16S\_V4\_E786R (Supplementary Table  
387 S6). Both 1:1 and 1:10 dilutions of each sample were prepared in duplicate with 0.5X  
388 SYBR Green I nucleic acid gel stain (Sigma-Aldrich, St. Louis, MO), plus 280 nM for  
389 each primer and the standard reagents in the Phusion High-Fidelity PCR Kit (New  
390 England BioLabs, Ipswich, MA). Samples were then cycled under the following qPCR  
391 conditions: 98°C 30 sec; 30 cycles of 98°C 30 sec, 52°C 30 sec, 72°C 30 sec; 4°C hold.  
392 Threshold cycles were calculated and dilutions were prepared to normalize samples and  
393 ensure consistent amplification cycles across plates. PCR under the same conditions,  
394 minus the SYBR Green, was completed in quadruplicate for each sample, then  
395 quadruplicate sets were pooled and purified with Agencourt AMPure XP Beads  
396 according to the manufacturer's protocol (Beckman Coulter, Brea, CA).

397 The second step PCR was used to add sample indices and final Illumina adaptors  
398 to the 16S rRNA gene amplicons. Reactions were compiled using the Phusion High-  
399 Fidelity PCR Kit according to the manufacturer's instructions, with 420 nM indexing  
400 primers PE-III-PCR-F and PE-IV-PCR-R (Supplementary Table S6), then cycled under  
401 the following conditions: 98°C 30 sec; 7 cycles of 98°C 30 sec, 83°C 30 sec, 72°C 30

402 sec; 4°C hold. Final libraries were purified with Agencourt AMPure XP Beads according  
403 to the manufacturer's protocol, then quantified and pooled prior to 2 × 250 paired-end  
404 sequencing on an Illumina MiSeq. Data are available on the NCBI database under the  
405 accession code PRJNA524696.

406

407 *16S rRNA gene amplicon data processing and operational taxonomic unit (OTU)*  
408 *analysis*

409 Raw reads were quality filtered and clustered into operational taxonomic units  
410 (OTUs) primarily with the QIIME software package<sup>48</sup> using default parameters unless  
411 otherwise noted. Paired-end reads were joined with the `join_paired_ends.py` command,  
412 then barcodes were extracted from the successfully joined reads with the  
413 `extract_barcodes.py` command (and additional parameters `-c barcode_in_label, -l 16, -s`  
414 `'#'`). Quality filtering was accomplished with `split_libraries_fastq.py` (`--barcode_type 16,`  
415 `--min_per_read_length_fraction 0.40, -q 20, --max_barcode_errors 0, --`  
416 `max_bad_run_length 0, --phred_offset 33`). We checked for the correct forward and  
417 reverse primers with a custom script and exported reads with primers removed and length  
418 trimmed to 225 bp. Finally, chimeric sequences were removed using  
419 `identify_chimeric_seqs.py` (`-m usearch61, --suppress_usearch61_ref`), followed by  
420 `filter_fasta.py`.

421 After quality filtering, reads were clustered into 97% OTUs, classified against a  
422 16S rRNA database, and aligned in order to build phylogenetic trees. We ran the QIIME  
423 commands `pick_otus.py`, `pick_rep_set.py` (`-m most_abundant`), and `make_otu_table.py` to

424 produce the OTU table. The RDP classifier was used to assign taxonomy with default  
425 parameters and the 16S rRNA training set<sup>49</sup>.

426 In this study, 16S rRNA gene amplicon sequencing resulted in over 10 million  
427 prokaryotic 16S rRNA gene reads, which were clustered into 3463 OTUs. Only rarefied  
428 OTU richness was considered further, in order to compensate for differences in  
429 sequencing depth between 144 samples. No DNA was detected in blank controls,  
430 suggesting that microbial contamination was negligible during incubation.

431

#### 432 *Bacterial isolation*

433 The natural complex C (bacterial cell lysate and sediment NOM)-amended  
434 enrichments at each time point were used as inocula for further bacterial isolation.  
435 Isolation from simple C enrichments was not pursued. The enrichment inoculum was  
436 streaked on a complex C agar plate, prepared using the same medium as corresponding  
437 liquid enrichment (cell lysate or NOM) with 1.5% agar (BD Biosciences, USA) and were  
438 incubated at 27°C in the dark. We also streaked the enrichment sample on diluted,  
439 commercially available culture media (with 1.5% agar), i.e., 1/25 LB, 1/25 tryptic soy  
440 broth (TSB), and 1/10 Reasoner's 2A (R2A), to obtain as many colonies as possible.  
441 Bacterial colonies were streaked again if necessary until single colonies were obtained.  
442 The single colony was picked from a plate and transferred to 3 ml of corresponding liquid  
443 media. The liquid cultures were incubated at 27°C in the dark for up to 3 weeks before  
444 DNA extraction. All the bacterial isolates were confirmed for growth and maintenance on  
445 easily available commercial media (1/25 LB, 1/25 TSB or 1/10 R2A).

446

447 *Species identification*

448 Genomic DNA of bacterial isolates were extracted using a PureLink Genomic  
449 DNA Mini Kit (Invitrogen, United States), following the manufacturer's protocol. 16S  
450 rRNA genes were amplified (initial denaturation step at 98°C for 5 min, followed by 30  
451 cycles at 95°C for 30 s, 50°C for 30 s and 72°C for 2 min, followed by a final step at  
452 72°C for 3 min) using the eubacterial primers 27F (AGA GTT TGA TCC TGG CTC AG)  
453 and 1492R (ACG GCT ACC TTG TTA CGA CTT) purchased from Integrated DNA  
454 Technologies, Inc. (USA). Cleanup of PCR products and DNA sequencing were  
455 performed at University of California Berkeley DNA Sequencing Facility. The PCR  
456 products were sequenced using the internal primers 27F and 1492R. Sequences were  
457 obtained by Sanger sequencing with ABI 3730XL DNA Analyzers (ThermoFisher,  
458 United States). Consensus sequences (1200–1400 base pairs) from forward and reverse  
459 sequences were generated using Geneious (version 9.1.3) and deposited in Genbank  
460 under the access codes listed in Table S2. The SILVA database was used for bacterial  
461 isolate classification. Sequence alignments, finding nearest neighbors, and phylogenetic  
462 tree reconstructions were performed in SILVA using SINA (v1.2.11) and RAxML.  
463 Phylogenetic tree visualization of the selected OTUs was performed using iTOL  
464 (<https://itol.embl.de>).

465

466 *Data analysis and statistics*

467 Shannon's diversity index ( $H'$ ) and multivariate statistics were performed using  
468 the R package *vegan*. OTU distributions were transformed into relative abundances using  
469 the function *decostand*. These were subjected to Hellinger transformation before

470 calculation of Bray-Curtis dissimilarity matrices comparing community composition  
471 between samples. Nonmetric multidimensional scaling (NMDS) using function *metaMDS*  
472 was performed using these dissimilarity matrices. A multivariate analysis of variance  
473 (MANOVA) model was implemented in the *vegan* function *adonis*. Analysis of similarity  
474 (ANOSIM) was carried out based on Bray-Curtis dissimilarities to evaluate the effect of  
475 C source and incubation time on community structure. We compared the relative  
476 abundance of taxa among the samples and selected ‘promoted’ OTUs using R software.  
477 Samples were compared by one-way ANOVA followed by the Dunnett’s test ( $p < 0.01$ )  
478 for multiple comparisons.

479

#### 480 **Acknowledgement**

481 This research by ENIGMA-Ecosystems and Networks Integrated with Genes and  
482 Molecular Assemblies (<http://enigma.lbl.gov>), a Scientific Focus Area Program at  
483 Lawrence Berkeley National Laboratory, is based upon work supported by the U.S.  
484 Department of Energy, Office of Science, Office of Biological & Environmental  
485 Research under contract number DE-AC02-05CH11231. The FRC groundwater sample  
486 was kindly provided by Terry C Hazen and Dominique C Joyner, Oak Ridge National  
487 Laboratory. We would also like to thank the MIT BioMicro Center for sequencing  
488 support. The sequencing efforts were funded by the National Institute of Environmental  
489 Health Sciences of the NIH under award P30-ES002109.

490

491 **Reference:**

- 492 1. Lloyd, K. G.; Steen, A. D.; Ladau, J.; Yin, J. Q.; Crosby, L., Phylogenetically Novel  
493 Uncultured Microbial Cells Dominate Earth Microbiomes. *Msystems* **2018**, 3 (5).
- 494 2. Giovannoni, S.; Stingl, U., The importance of culturing bacterioplankton in the 'omics'  
495 age. *Nature Reviews Microbiology* **2007**, 5 (10), 820-826.
- 496 3. Overmann, J., Principles of Enrichment, Isolation, Cultivation, and Preservation of  
497 Prokaryotes. In *The Prokaryotes*, Dworkin, M.; Falkow, S.; Rosenberg, E.; Schleifer,  
498 K.-H.; Stackebrandt, E. (Eds.), Springer-Verlag New York, **2006**.
- 499 4. Eilers, H.; Pernthaler, J.; Glockner, F. O.; Amann, R., Culturability and in situ  
500 abundance of pelagic bacteria from the North Sea. *Applied and Environmental*  
501 *Microbiology* **2000**, 66 (7), 3044-3051.
- 502 5. Cui, Y. W.; Zhang, H. Y.; Lu, P. F.; Peng, Y. Z., Effects of carbon sources on the  
503 enrichment of halophilic polyhydroxyalkanoate-storing mixed microbial culture in an  
504 aerobic dynamic feeding process. *Scientific Reports* **2016**, 6.
- 505 6. Wawrik, B.; Kerkhof, L.; Kukor, J.; Zylstra, G., Effect of different carbon sources on  
506 community composition of bacterial enrichments from soil. *Applied and Environmental*  
507 *Microbiology* **2005**, 71 (11), 6776-6783.
- 508 7. Lok, C., Mining the microbial dark matter. *Nature* **2015**, 522 (7556), 270-273.
- 509 8. Overmann, J.; Abt, B.; Sikorski, J., Present and Future of Culturing Bacteria. *Annual*  
510 *Review of Microbiology*, Vol 71 **2017**, 71, 711-730.
- 511 9. Steen, A. D.; Crits-Christoph, A.; Carini, P.; DeAngelis, K. M.; Fierer, N.; Lloyd,  
512 K. G.; Thrash, J. C., High proportions of bacteria and archaea across most biomes remain  
513 uncultured. *Isme Journal* **2019**, 13 (12), 3126-3130.
- 514 10. Martiny, A. C., The '1% culturability paradigm' needs to be carefully defined. *Isme*  
515 *Journal* **2020**, 14 (1), 10-11.
- 516 11. Zengler, K.; Toledo, G.; Rappe, M.; Elkins, J.; Mathur, E. J.; Short, J. M.; Keller,  
517 M., Cultivating the uncultured. *Proceedings of the National Academy of Sciences of the*  
518 *United States of America* **2002**, 99 (24), 15681-15686.
- 519 12. Kaerberlein, T.; Lewis, K.; Epstein, S. S., Isolating "uncultivable" microorganisms in  
520 pure culture in a simulated natural environment. *Science* **2002**, 296 (5570), 1127-1129.
- 521 13. Connon, S. A.; Giovannoni, S. J., High-throughput methods for culturing  
522 microorganisms in very-low-nutrient media yield diverse new marine isolates. *Applied*  
523 *and Environmental Microbiology* **2002**, 68 (8), 3878-3885.
- 524 14. Rappe, M. S.; Connon, S. A.; Vergin, K. L.; Giovannoni, S. J., Cultivation of the  
525 ubiquitous SAR11 marine bacterioplankton clade. *Nature* **2002**, 418 (6898), 630-633.
- 526 15. Tuan Manh, N.; Seo, C.; Ji, M.; Paik, M.-J.; Myung, S.-W.; Kim, J., Effective Soil  
527 Extraction Method for Cultivating Previously Uncultured Soil Bacteria. *Applied and*  
528 *Environmental Microbiology* **2018**, 84 (24).
- 529 16. Henson, M. W.; Pitre, D. M.; Weckhorst, J. L.; Lanclos, V. C.; Webber, A. T.;  
530 Thrash, J. C., Artificial Seawater Media Facilitate Cultivating Members of the Microbial  
531 Majority from the Gulf of Mexico. *Msphere* **2016**, 1 (2).
- 532 17. Bartelme, R. P.; Custer, J. M.; Dupont, C.; Espinoza, J. L.; Torralba, M.; Khalili,  
533 B.; Carini, P., The concentration of heterotrophic growth substrates in culture medium is  
534 a crucial determinant of the culturability of subsurface soil microbes. **2019**; Vol. bioRxiv  
535 726661; doi: <https://doi.org/10.1101/726661>.

- 536 18. Wu, X.; Wu, L.; Liu, Y.; Zhang, P.; Li, Q.; Zhou, J.; Hess, N. J.; Hazen, T. C.;  
537 Yang, W.; Chakraborty, R., Microbial Interactions With Dissolved Organic Matter Drive  
538 Carbon Dynamics and Community Succession. *Frontiers in Microbiology* **2018**, *9*, [1234](#).  
539 19. Balch, W. E.; Fox, G. E.; Magrum, L. J.; Woese, C. R.; Wolfe, R. S.,  
540 METHANOGENS - RE-EVALUATION OF A UNIQUE BIOLOGICAL GROUP.  
541 *Microbiological Reviews* **1979**, *43* (2), 260-296.  
542 20. Coates, J. D.; Lonergan, D. J.; Philips, E. J. P.; Jenter, H.; Lovley, D. R.,  
543 *Desulfuromonas palmitatis* sp nov, a marine dissimilatory Fe III reducer that can oxidize  
544 long-chain fatty acids. *Archives of Microbiology* **1995**, *164* (6), 406-413.  
545 21. Rossi-Tamisier, M.; Benamar, S.; Raoult, D.; Fournier, P. E., Cautionary tale of  
546 using 16S rRNA gene sequence similarity values in identification of human-associated  
547 bacterial species. *International Journal of Systematic and Evolutionary Microbiology*  
548 **2015**, *65*, 1929-1934.  
549 22. Stackebrandt, E.; Ebers, J., Taxonomic parameters revisited: tarnished gold standards.  
550 *Microbiology Today* **2006**, *33*, 152-155.  
551 23. Vartoukian, S. R.; Palmer, R. M.; Wade, W. G., Strategies for culture of  
552 'unculturable' bacteria. *Fems Microbiology Letters* **2010**, *309* (1), 1-7.  
553 24. Janssen, P. H.; Yates, P. S.; Grinton, B. E.; Taylor, P. M.; Sait, M., Improved  
554 culturability of soil bacteria and isolation in pure culture of novel members of the  
555 divisions Acidobacteria, Actinobacteria, Proteobacteria, and Verrucomicrobia. *Applied*  
556 *and Environmental Microbiology* **2002**, *68* (5), 2391-2396.  
557 25. Schoenborn, L.; Yates, P. S.; Grinton, B. E.; Hugenholtz, P.; Janssen, P. H., Liquid  
558 serial dilution is inferior to solid media for isolation of cultures representative of the  
559 phylum-level diversity of soil bacteria. *Applied and Environmental Microbiology* **2004**,  
560 *70* (7), 4363-4366.  
561 26. Nichols, D.; Cahoon, N.; Trakhtenberg, E. M.; Pham, L.; Mehta, A.; Belanger, A.;  
562 Kanigan, T.; Lewis, K.; Epstein, S. S., Use of Ichip for High-Throughput In Situ  
563 Cultivation of "Uncultivable" Microbial Species. *Applied and Environmental*  
564 *Microbiology* **2010**, *76* (8), 2445-2450.  
565 27. Bollmann, A.; Lewis, K.; Epstein, S. S., Incubation of environmental samples in a  
566 diffusion chamber increases the diversity of recovered isolates. *Applied and*  
567 *Environmental Microbiology* **2007**, *73* (20), 6386-6390.  
568 28. Bollmann, A.; Palumbo, A. V.; Lewis, K.; Epstein, S. S., Isolation and Physiology  
569 of Bacteria from Contaminated Subsurface Sediments. *Applied and Environmental*  
570 *Microbiology* **2010**, *76* (22), 7413-7419.  
571 29. Janssen, P. H.; Schuhmann, A.; Morschel, E.; Rainey, F. A., Novel anaerobic  
572 ultramicrobacteria belonging to the Verrucomicrobiales lineage of bacterial descent  
573 isolated by dilution culture from anoxic rice paddy soil. *Applied and Environmental*  
574 *Microbiology* **1997**, *63* (4), 1382-1388.  
575 30. Joseph, S. J.; Hugenholtz, P.; Sangwan, P.; Osborne, C. A.; Janssen, P. H.,  
576 Laboratory cultivation of widespread and previously uncultured soil bacteria. *Applied*  
577 *and Environmental Microbiology* **2003**, *69* (12), 7210-7215.  
578 31. Erikstad, H.-A.; Birkeland, N.-K., Draft Genome Sequence of "Candidatus  
579 *Methylophilum kamchatkense*" Strain Kam1, a Thermoacidophilic Methanotropic  
580 Verrucomicrobium. *Microbiology Resource Announcements* **2015**, *3* (2).



- 581 32. Spring, S.; Brinkmann, N.; Murrja, M.; Sproeer, C.; Reitner, J.; Klenk, H.-P., High  
582 Diversity of Culturable Prokaryotes in a Lithifying Hypersaline Microbial Mat.  
583 *Geomicrobiology Journal* **2015**, 32 (3-4), 332-346.
- 584 33. Matsuzawa, H.; Tanaka, Y.; Tamaki, H.; Kamagata, Y.; Mori, K., Culture-  
585 Dependent and Independent Analyses of the Microbial Communities Inhabiting the Giant  
586 Duckweed (*Spirodela polyrrhiza*) Rhizoplane and Isolation of a Variety of Rarely  
587 Cultivated Organisms within the Phylum Verrucomicrobia. *Microbes and Environments*  
588 **2010**, 25 (4), 302-308.
- 589 34. Bergmann, G. T.; Bates, S. T.; Eilers, K. G.; Lauber, C. L.; Caporaso, J. G.;  
590 Walters, W. A.; Knight, R.; Fierer, N., The under-recognized dominance of  
591 Verrucomicrobia in soil bacterial communities. *Soil Biology & Biochemistry* **2011**, 43  
592 (7), 1450-1455.
- 593 35. Freitas, S.; Hatosy, S.; Fuhrman, J. A.; Huse, S. M.; Welch, D. B. M.; Sogin, M.  
594 L.; Martiny, A. C., Global distribution and diversity of marine Verrucomicrobia. *Isme*  
595 *Journal* **2012**, 6 (8), 1499-1505.
- 596 36. Lage, O. M.; Bondoso, J., Bringing Planctomycetes into pure culture. *Frontiers in*  
597 *Microbiology* **2012**, 3.
- 598 37. Tamaki, H.; Tanaka, Y.; Matsuzawa, H.; Muramatsu, M.; Meng, X. Y.; Hanada,  
599 S.; Mori, K.; Kamagata, Y., *Armatimonas rosea* gen. nov., sp nov., of a novel bacterial  
600 phylum, *Armatimonadetes* phyl. nov., formally called the candidate phylum OP10.  
601 *International Journal of Systematic and Evolutionary Microbiology* **2011**, 61, 1442-1447.
- 602 38. Lee, K. C. Y.; Dunfield, P. F.; Morgan, X. C.; Crowe, M. A.; Houghton, K. M.;  
603 Vyssotski, M.; Ryan, J. L. J.; Lagutin, K.; McDonald, I. R.; Stott, M. B.,  
604 *Chthonomonas calidirosea* gen. nov., sp nov., an aerobic, pigmented, thermophilic micro-  
605 organism of a novel bacterial class, *Chthonomonadetes classis* nov., of the newly  
606 described phylum *Armatimonadetes* originally designated candidate division OP10.  
607 *International Journal of Systematic and Evolutionary Microbiology* **2011**, 61, 2482-2490.
- 608 39. Im, W. T.; Hu, Z. Y.; Kim, K. H.; Rhee, S. K.; Meng, H.; Lee, S. T.; Quan, Z. X.,  
609 Description of *Fimbriimonas ginsengisoli* gen. nov., sp nov within the *Fimbriimonadia*  
610 class nov., of the phylum *Armatimonadetes*. *Antonie Van Leeuwenhoek International*  
611 *Journal of General and Molecular Microbiology* **2012**, 102 (2), 307-317.
- 612 40. Li, J.; Kudo, C.; Tonouchi, A., *Capsulimonas corticalis* gen. nov., sp. nov., an  
613 aerobic capsulated bacterium, of a novel bacterial order, *Capsulimonadales* ord. nov., of  
614 the class *Armatimonadia* of the phylum *Armatimonadetes*. *International Journal of*  
615 *Systematic and Evolutionary Microbiology* **2019**, 69 (1), 220-226.
- 616 41. Barbieri, E.; Potenza, L.; Rossi, I.; Sisti, D.; Giomaro, G.; Rossetti, S.; Beimfohr,  
617 C.; Stocchi, V., Phylogenetic characterization and in situ detection of a *Cytophaga-*  
618 *Flexibacter-Bacteroides* phylogroup bacterium in *Tuber borchii* Vittad, ectomycorrhizal  
619 mycelium. *Applied and Environmental Microbiology* **2000**, 66 (11), 5035-+.
- 620 42. Field, E. K.; D'Imperio, S.; Miller, A. R.; VanEngelen, M. R.; Gerlach, R.; Lee, B.  
621 D.; Apel, W. A.; Peyton, B. M., Application of Molecular Techniques To Elucidate the  
622 Influence of Cellulosic Waste on the Bacterial Community Structure at a Simulated Low-  
623 Level-Radioactive-Waste Site. *Applied and Environmental Microbiology* **2010**, 76 (10),  
624 3106-3115.

- 625 43. Shi, P.; Jia, S. Y.; Zhang, X. X.; Zhang, T.; Cheng, S. P.; Li, A. M., Metagenomic  
626 insights into chlorination effects on microbial antibiotic resistance in drinking water.  
627 *Water Research* **2013**, *47* (1), 111-120.
- 628 44. Geissler, A.; Selenska-Pobell, S., Addition of U(VI) to a uranium mining waste  
629 sample and resulting changes in the indigenous bacterial community. *Geobiology* **2005**, *3*  
630 (4), 275-285.
- 631 45. Sheu, S. Y.; Chen, T. Y.; Young, C. C.; Chen, W. M., *Stagnimonas aquatica* gen.  
632 nov., sp. nov., a new member of the family Nevskiaceae isolated from a freshwater  
633 mesocosm. *International Journal of Systematic and Evolutionary Microbiology* **2019**, *69*  
634 (6), 1606-1612.
- 635 46. Wang, X. F.; Cho, K. S.; Son, A., Ultrasonication as a rapid and high yield DNA  
636 extraction method for bacterial gene quantification by NanoGene assay. *Biotechnology*  
637 *and Bioprocess Engineering* **2015**, *20* (6), 1133-1140.
- 638 47. Simmon, K. E.; Steadman, D. D.; Durkin, S.; Baldwin, A.; Jeffrey, W. H.;  
639 Sheridan, P.; Horton, R.; Shields, M. S., Autoclave method for rapid preparation of  
640 bacterial PCR-template DNA. *Journal of Microbiological Methods* **2004**, *56* (2), 143-  
641 149.
- 642 48. Caporaso, J. G.; Kuczynski, J.; Stombaugh, J.; Bittinger, K.; Bushman, F. D.;  
643 Costello, E. K.; Fierer, N.; Pena, A. G.; Goodrich, J. K.; Gordon, J. I.; Huttley, G. A.;  
644 Kelley, S. T.; Knights, D.; Koenig, J. E.; Ley, R. E.; Lozupone, C. A.; McDonald, D.;  
645 Muegge, B. D.; Pirrung, M.; Reeder, J.; Sevinsky, J. R.; Tumbaugh, P. J.; Walters, W.  
646 A.; Widmann, J.; Yatsunenko, T.; Zaneveld, J.; Knight, R., QIIME allows analysis of  
647 high-throughput community sequencing data. *Nature Methods* **2010**, *7* (5), 335-336.
- 648 49. Wang, Q.; Garrity, G. M.; Tiedje, J. M.; Cole, J. R., Naive Bayesian classifier for  
649 rapid assignment of rRNA sequences into the new bacterial taxonomy. *Applied and*  
650 *Environmental Microbiology* **2007**, *73* (16), 5261-5267.

651  
652

653 **Figure legends:**

654

655 **Figure 1.** Non-metric multidimensional scaling (NMDS) based on Bray-Curtis  
656 dissimilarities of bacterial community composition.

657

658 **Figure 2.** Diverse bacteria enriched with complex natural organic C sources. (A) Box and  
659 whisker plots illustrating the relative diversity of bacterial community in enrichments  
660 amended with different C sources as compared to the unamended control. Relative  
661 diversity is calculated as  $H_i' / H_0'$ .  $H_i'$  is Shannon's diversity index of individual sample,  
662  $H_0'$  is the average Shannon's diversity index of unamended control at corresponding  
663 sampling time point. Significant differences between C-amended group and unamended  
664 control is indicated by \*\*\* when  $p < 0.001$ , \*\* when  $p < 0.01$ , and \* when  $p < 0.05$ . (B)  
665 Temporal community structures of each C-amended group reported as relative abundance  
666 of taxonomic phyla over 3 timepoints (Days 10, 20, and 30).

667

668 **Figure 3.** Selected bacterial species (one-way ANOVA with Dunnett's multiple  
669 comparison adjustment,  $p$ -value  $< 0.01$ ) that are promoted to grow by simple C sources  
670 (glucose, acetate, benzoate, and oleic acid) and complex natural organic C sources  
671 (bacterial cell lysate and sediment NOM) in enrichment cultures as compared to the  
672 unamended control. (A) Phylogenetic tree (constructed with RAxML) of 'promoted'  
673 OTUs. OTU labels are highlighted according to their phylum. Bold OTU labels designate  
674 OTUs for which we isolated representative species (99-100% identity). Markers  
675 surrounding the tree denote the day (10 - square, 20 - circle, or 30 - star) and C substrate  
676 in which the OTU is significantly enriched. (B) The number of OTUs that are promoted  
677 exclusively by simple C sources, exclusively by complex natural organic C sources, and  
678 by both simple and complex C sources.

679

680 **Figure 4.** Phylogenetic tree of representative bacterial isolates representing 54 distinct  
681 species. The tree is constructed from near full-length 16S rRNA gene sequences.  
682 Undescribed species (black), novel candidate species (blue), and novel candidate genus  
683 members (red) are shown by dot colors. The class and order of the representative isolates  
684 are listed on the right.

685

686 **Figure 5.** Phylogenetic tree of FW305-C-21 and the most similar bacteria based on 16S  
687 rRNA genes. Scale bar indicates a change of 0.02 per nucleotide. The 16S rRNA gene  
688 sequences were aligned using SINA against the SILVA alignment and the maximum  
689 likelihood tree was calculated using RAxML. The top five organisms are as far cultured  
690 organisms within this family.

691

692

693

694

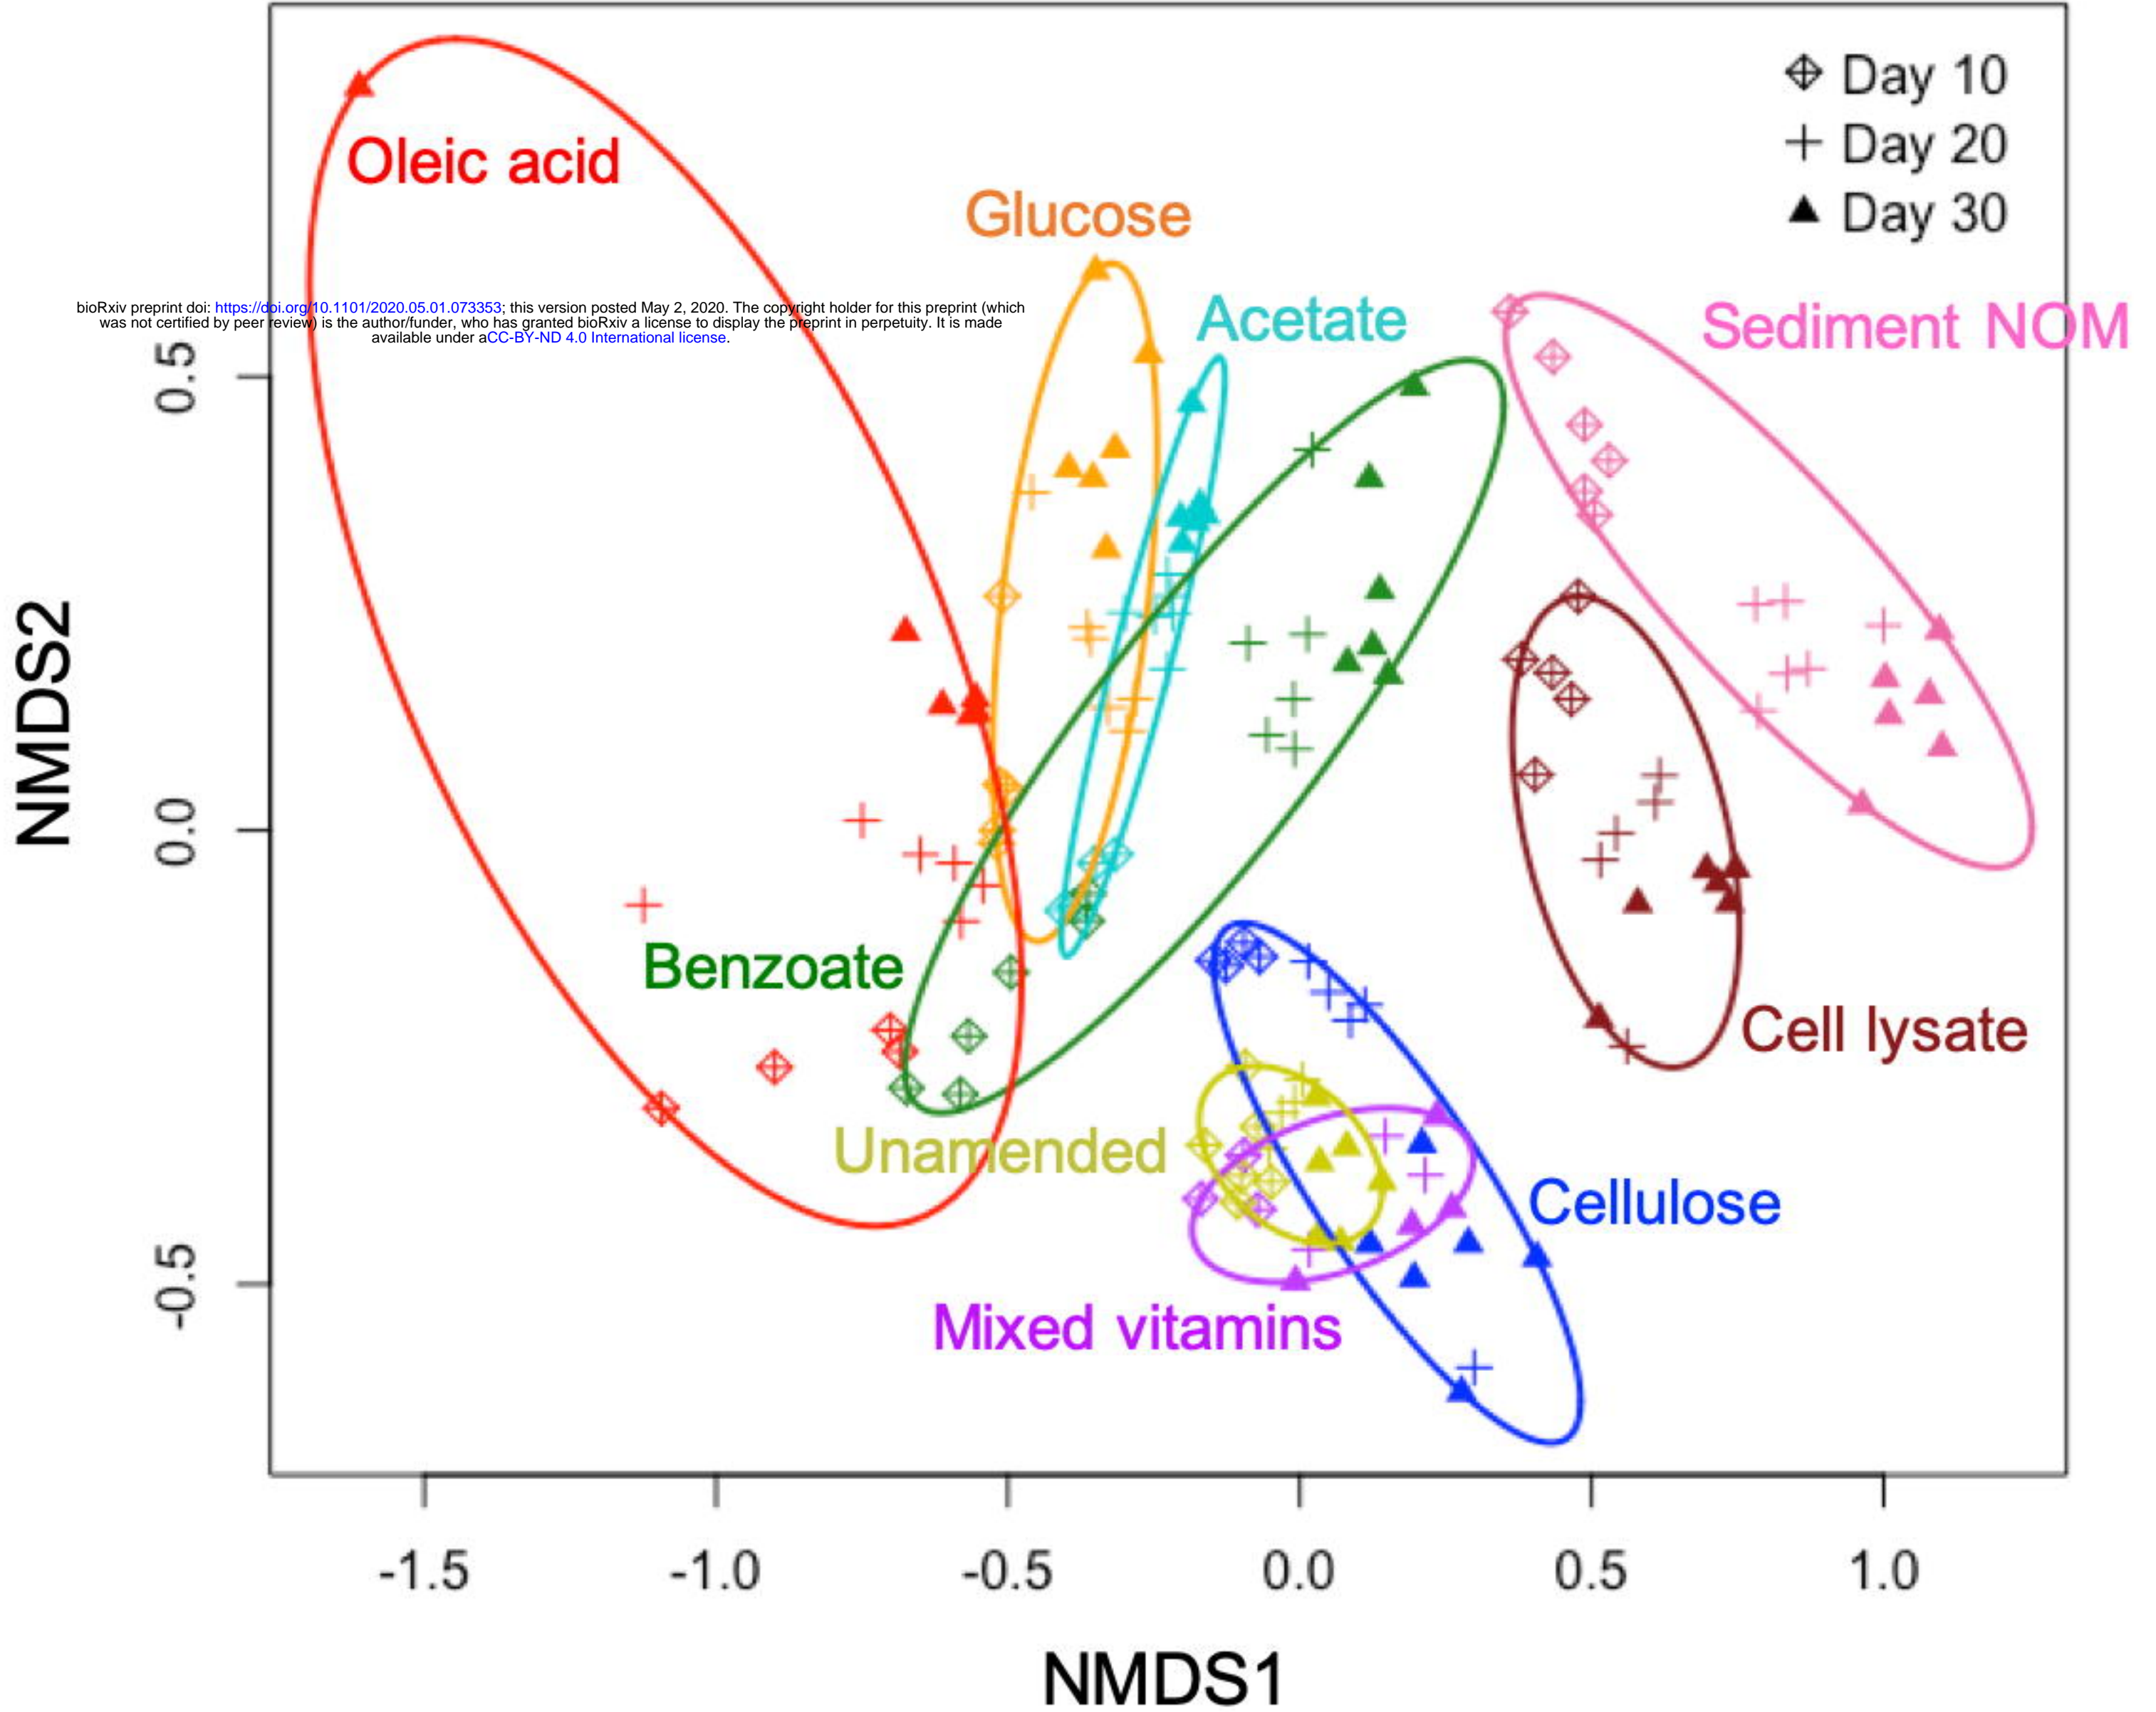

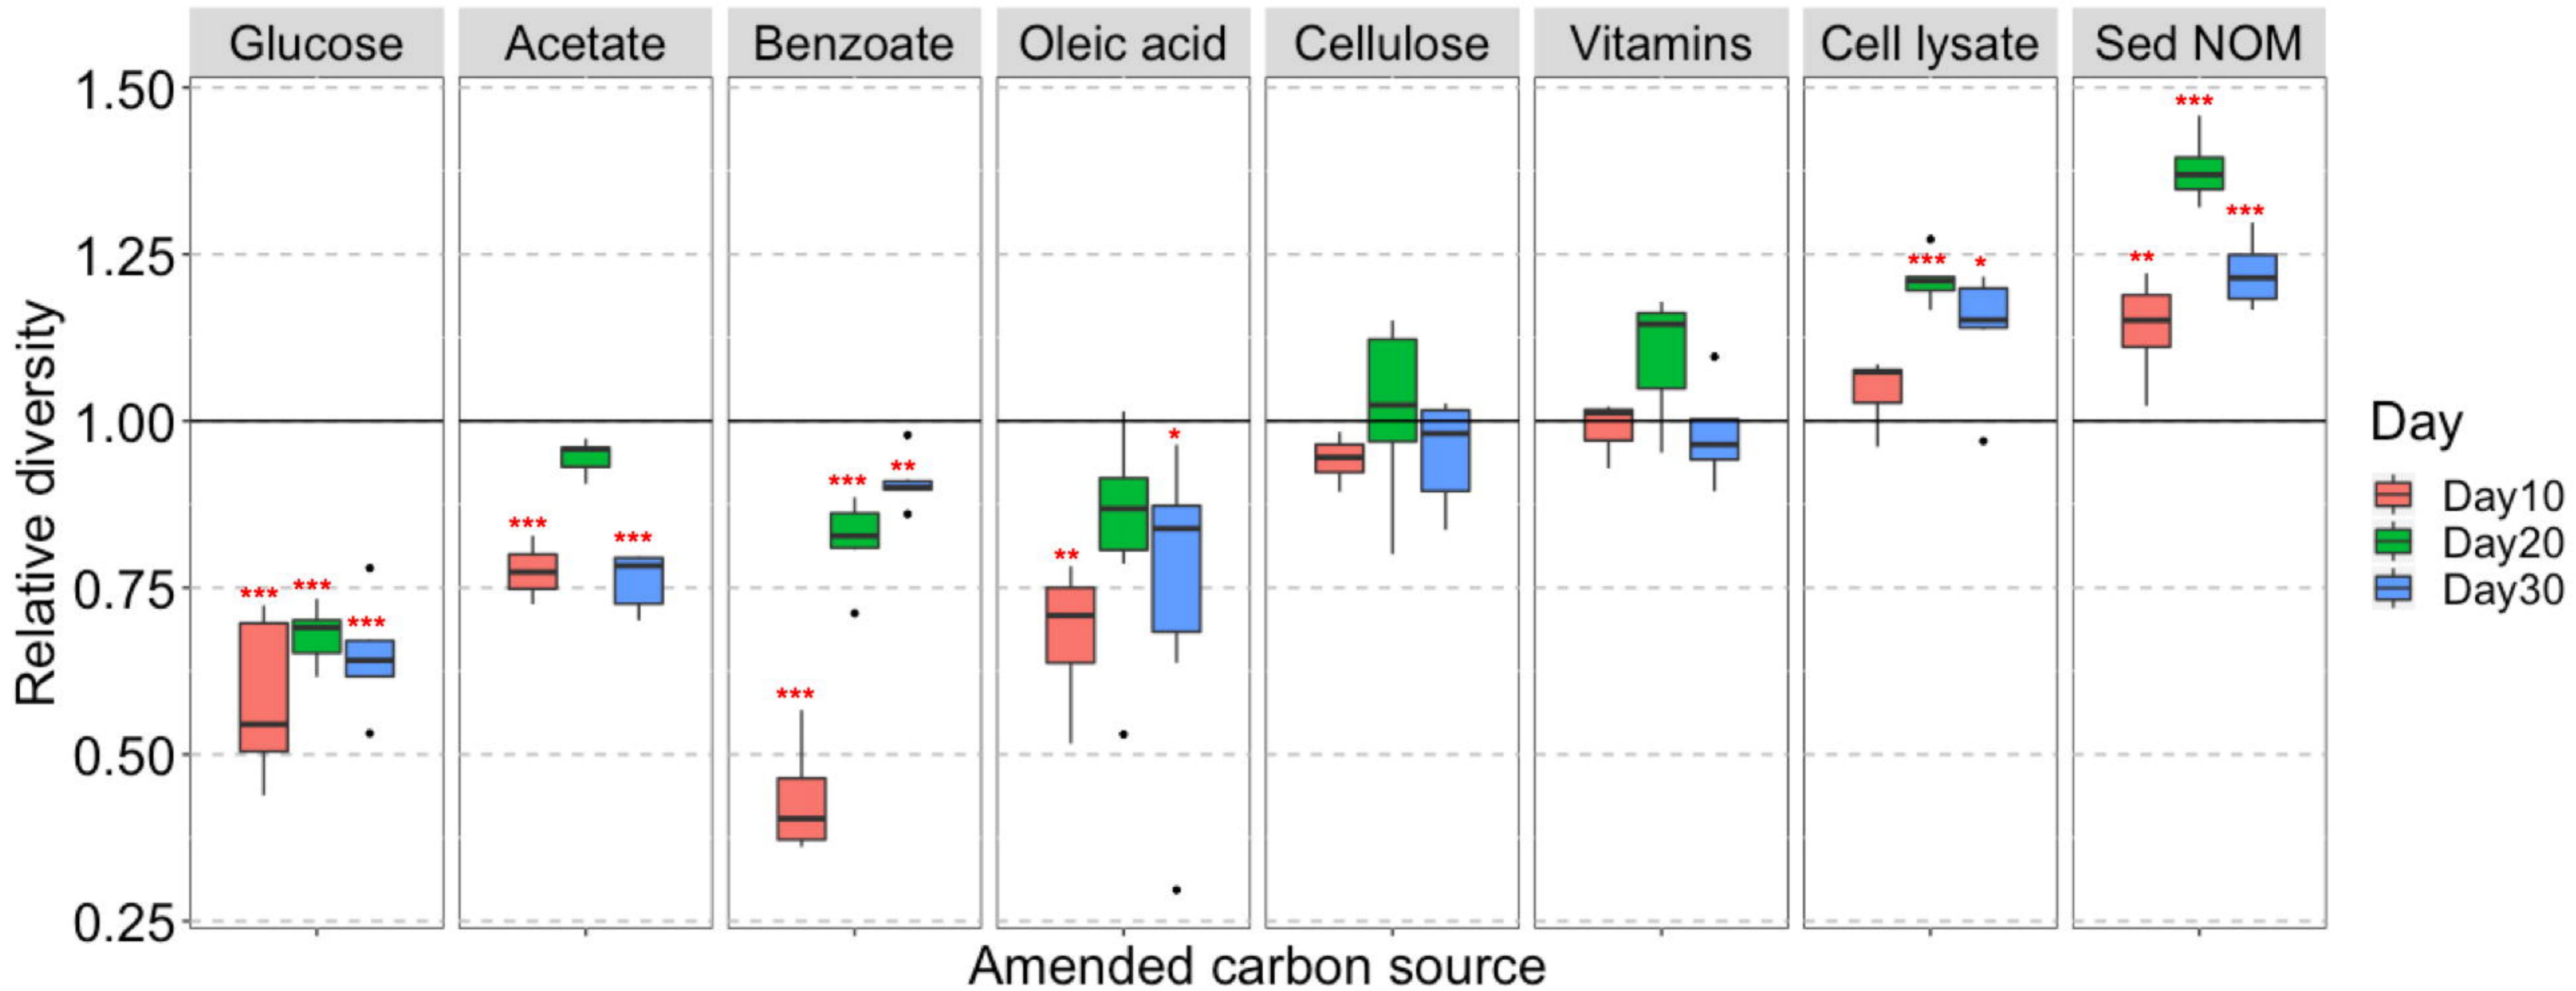











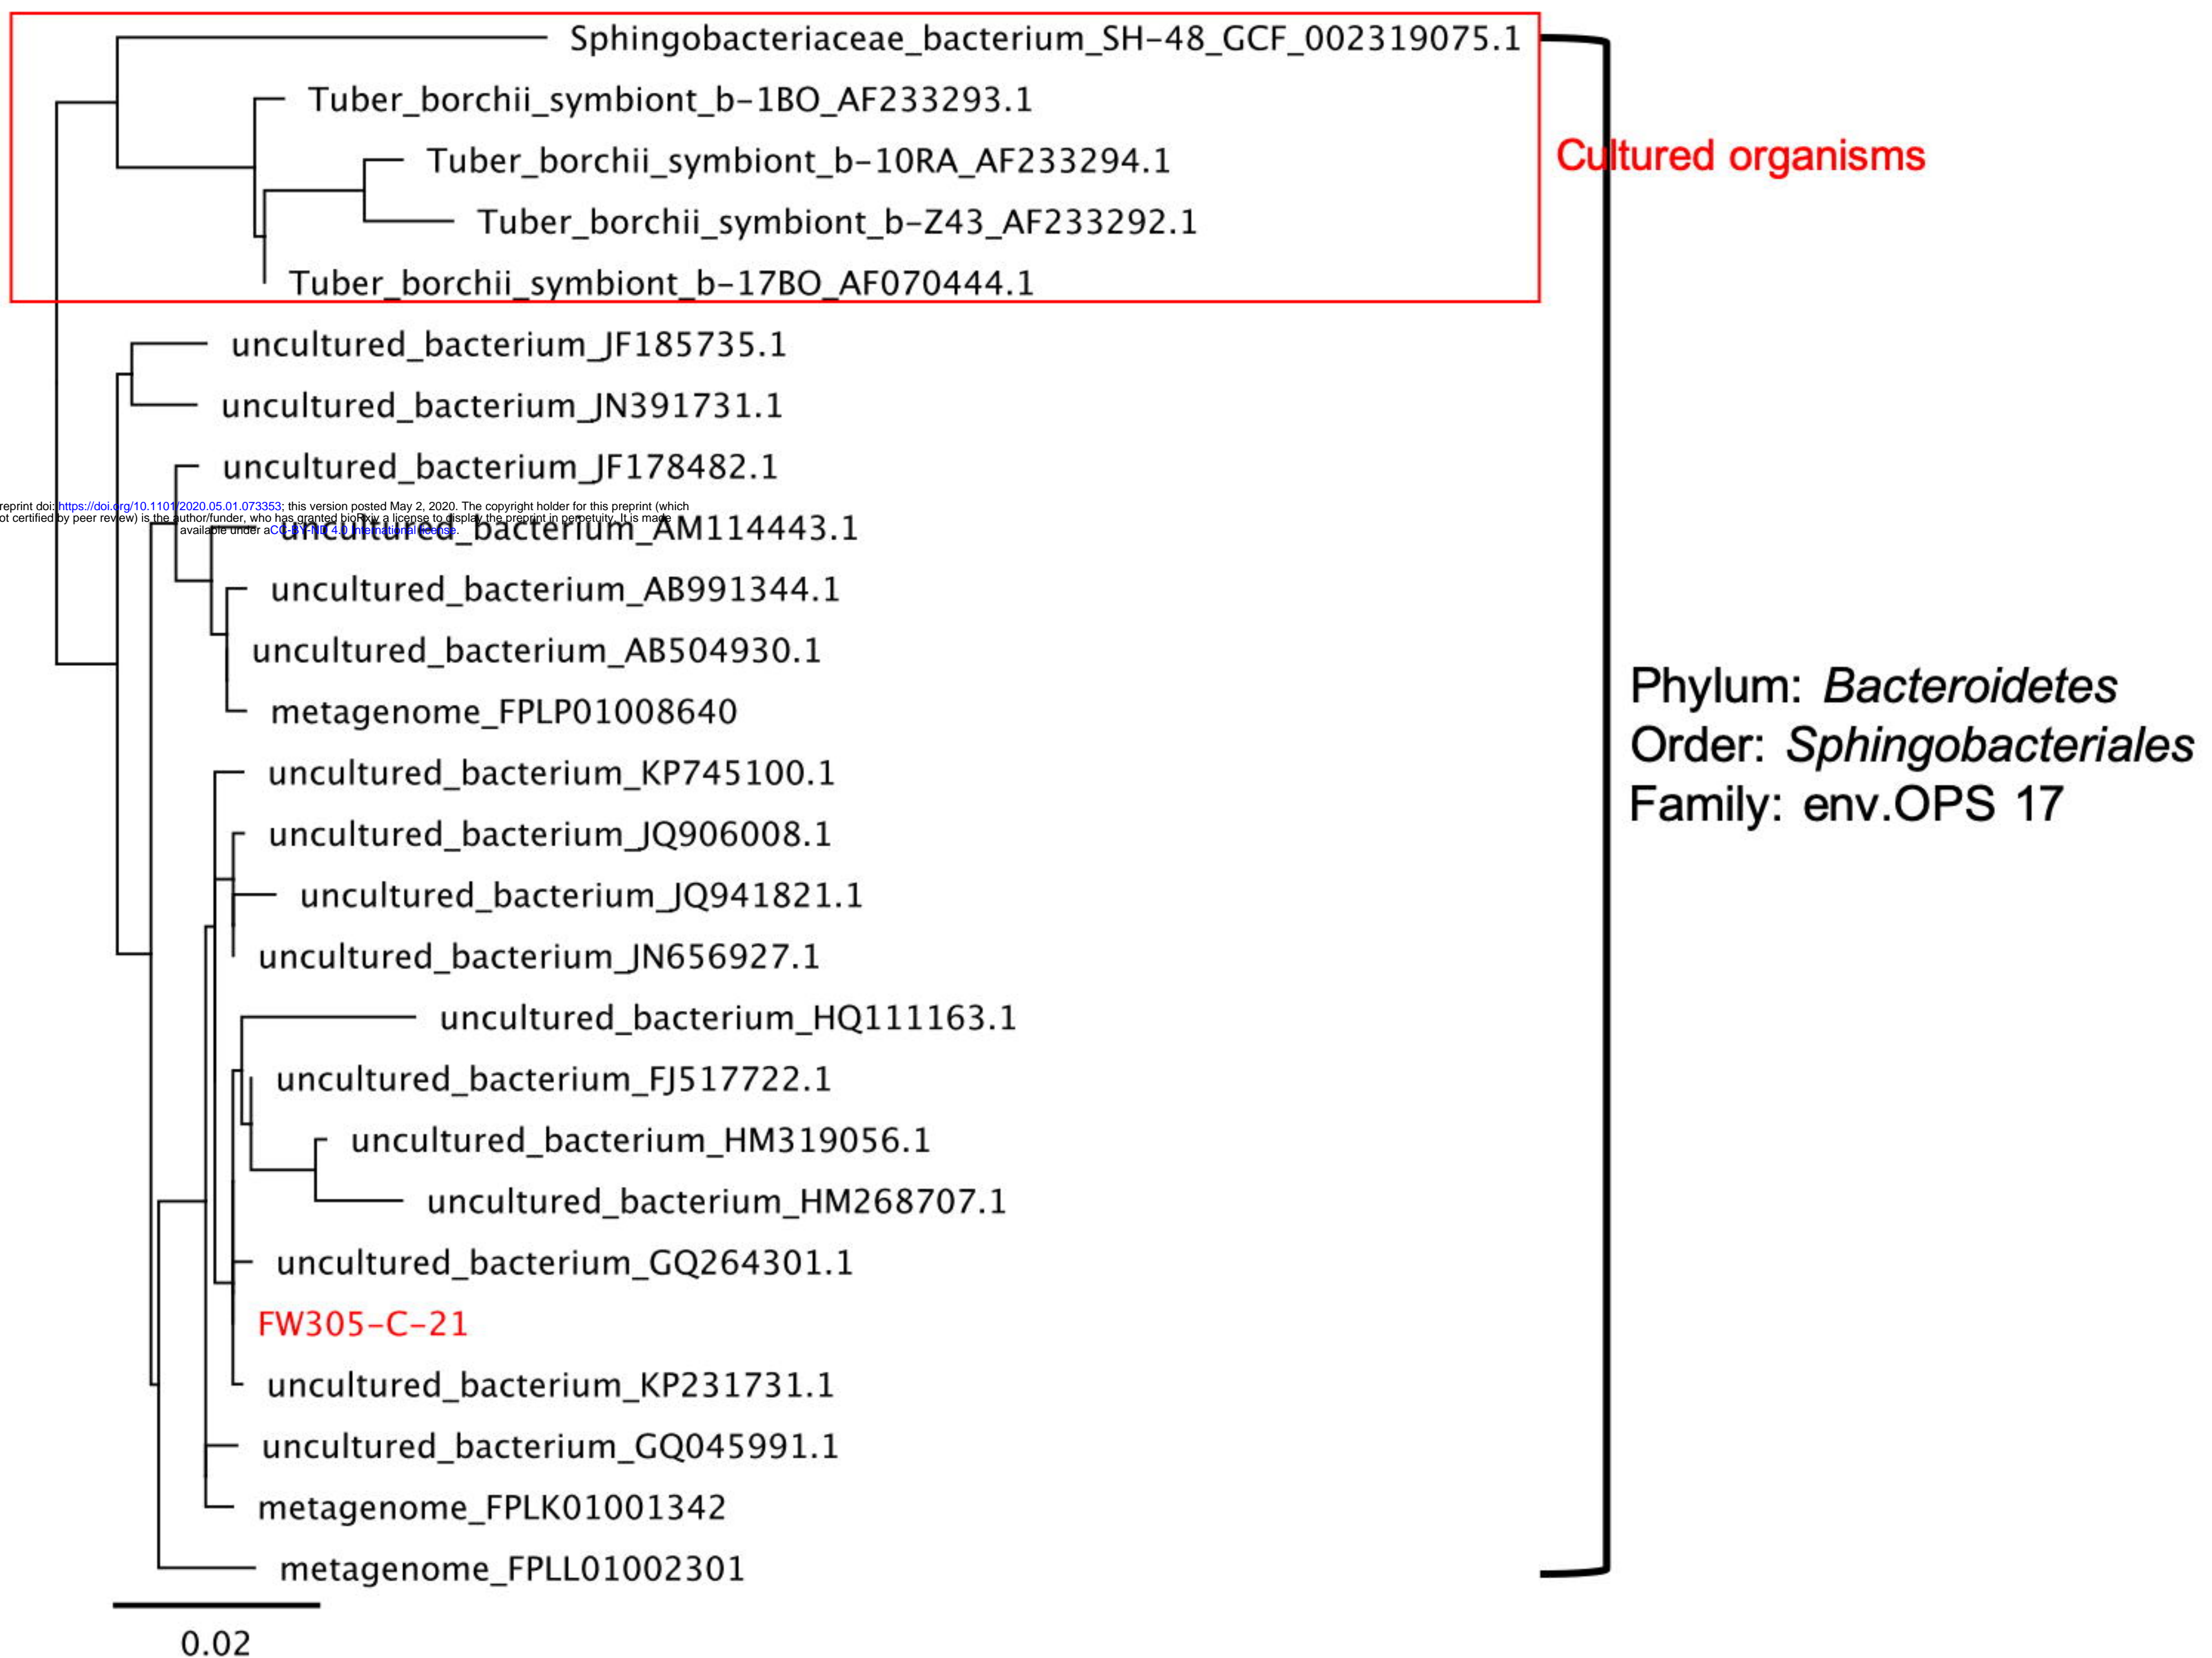

Source: https://www.biorxiv.org/content/10.1101/2020.05.01.073353v1.full.pdf
